# Supplementary material
Source: ML conference proceedings conference paper supplement (https://aclanthology.org/2021.acl-long.1)
Supplement: OptionalSupplementaryMaterial [file guidelines.pdf › data/guidelines.pdf]

## Annotationsrichtlinie: Meinungen auf Twitter zu Maßnahmen der Regierung zur Eindämmung der Coronapandemie

Die weltweite Ausbreitung der Corona-Pandemie erforderte schnelle Maßnahmen von Regierungen, um die Ausbreitung des COVID-19 Virus einzudämmen. Die (möglichen) Auswirkungen solcher Maßnahmen wurden in den öffentlichen und sozialen Medien intensiv diskutiert. Konkret umfassen diese Maßnahmen zur Eindämmung der COVID-19 Pandemie all jene Regelungen, die den Kontakt der Menschen untereinander auf ein Mindestmaß reduzieren sollten: Ausgangsbeschränkungen und -verbote, wirtschaftliche Einschränkungen, Schließungen von öffentlichen Einrichtungen und Plätzen sowie von allen privaten Einrichtungen, die über die Abdeckung des Grundbedarfs hinausgehen (Aufzählung ist beispielhaft und nicht umfassend zu verstehen).

Das Ziel dieser Annotationsstudie ist es, befürwortende und ablehnende Positionen zu diesen **Maßnahmen, die von Regierungen zur Eindämmung der Pandemie ergriffen wurden**, in der öffentlichen Debatte zu identifizieren.

Die Klassifikation ist dabei zweistufig und wird über folgende zentrale Fragen adressiert:

### 1) Bezieht sich der Beitrag tatsächlich auf Maßnahmen der Regierung zur Eindämmung der COVID-19 Pandemie?

Obacht! Folgende Hinweise sind dabei zu beachten:

- **Tweet zur Pandemie, aber keine Maßnahme thematisiert:** Denkbar ist beispielsweise, dass sich ein Tweet zwar auf die Pandemie bezieht, aber keine Maßnahmen thematisiert, um der Verbreitung Herr zu werden.

Beispiele: „*Warum läuft @hartaberrfair wieder mal angenehm nüchtern ab, während man sich gestern wieder mehrmals für @annewill freudschämen musste? #COVID-19 #corona #wirbleibenzuhause*“

„@narimoldi Und wie ist Ihre Meinung betreffend des Coronavirus?: 1. es gibt es gar nicht? Oder 2. es gibt es, aber der Markt regelt das schon. A propos, wo ist eigentlich der Markt geblieben?“

- **Maßnahmen zur Eindämmung der Pandemie vs. Maßnahmen des allgemeinen Krisenmanagements:** Es sollen nur Maßnahmen zur unmittelbaren Eindämmung der Pandemie und nicht alle Maßnahmen des Krisenmanagements generell berücksichtigt werden.

Beispiele für Maßnahmen als Teil des allgemeinen Krisenmanagements, die nicht direkt zur Eindämmung der Pandemie ergriffen wurden: *Erweiterung der Lenkzeiten von LKWs in der Krise um Versorgung sicher zu stellen oder Maßnahmen, um Unternehmen zu stützen, Lockerungsmaßnahmen der pandemiebedingten Einschränkungen.*

- **Maßnahmen der Regierung vs. Maßnahmen anderer Institutionen/Einrichtungen:** In der Krise wurden zahlreiche Maßnahmen ergriffen, die von privaten Akteuren wie Unternehmen und Organisationen initiiert wurden. Diese Nicht-Regierungsmaßnahmen (z.B. Homeoffice) sollen nicht berücksichtigt werden.
- Es ist **allgemein die Rede von „Maßnahmen“** ohne weitere Konkretisierung im Tweet: Hierbei gehen wir grundsätzlich davon aus, dass es sich um Maßnahmen der Regierung zur Eindämmung der Pandemie handelt.

Beispiel: „Aufgrund der Corona-Maßnahmen findet die Fortbildungsreihe für eine partizipationsorientierte & diskriminierungskritische Arbeit mit #Geflüchteten momentan online statt. Bis zum 20. Mai gibt es noch 5 #Webinare. Für Infos & Anmeldung bitte her entlang“

- Berücksichtigt werden außerdem **Maßnahmen in allen Ländern**, die von der Regierung eingeführt wurden, – nicht nur diejenigen in Deutschland

Beispiel: „#coronavirus: Italien riegelt Städte ab“

## 2) Enthält der Beitrag eine eindeutige Position für oder gegen die Maßnahmen der Regierung zur Eindämmung der Covid-19 Pandemie und werden die Maßnahmen darin eher positiv oder eher negativ bewertet?

Ergänzende Erklärung: Es geht darum, dass der Standpunkt bzw. die Haltung der oder des Autoren eindeutig pro oder contra ist. Dazu muss die Position nicht explizit geäußert werden, sie kann auch implizit zu Tage treten (z.B. durch Ironie). Folgende Formen der impliziten Äußerung können beispielsweise auftreten:

- In dem Tweet werden **neutral eindeutige positive/negative Folgen/Begleiterscheinungen** der Maßnahmen wiedergegeben. Hierbei handelt es sich um eine Pro/Contra-Haltung, da angenommen wird, dass der Autor des Tweets diese nur deshalb wiedergibt, um seine Haltung auszudrücken.

Beispiele: “Die Maßnahmen zur Eindämmung der #Corona-Pandemie haben in #Sachsen kurzfristig zu weniger Straftaten und Verkehrsunfällen geführt. Grundsätzlich sei die Anzahl der polizeilich erfassten Einsätze zur Zeit rückläufig, so die @PolizeiSachsen. #CoronaSN”

„Hier sind mal ein paar spannende Fakten zum #coronavirus Ausbruch: Wusstet ihr, dass die häusliche Gewalt in China und Italien seit der Ausgangssperre angestiegen ist? #COVID19 #CoronaVirusDE“

- Wenn in einem Tweet **die Meinung anderer Akteure zu Maßnahmen** der Regierung zur Eindämmung der Pandemie wiedergegeben werden, zählt dies als Position im oben genannten Sinne. Dabei wird angenommen, dass

der Autor des Tweets diese Haltung gerade deshalb veröffentlicht, weil er sich mit ihr gemein machen möchte.

Beispiel: „*Grünen-Fraktionschefin Göring-Eckardt kritisiert „Maßnahmen-Wettlauf“ in Corona-Krise*“

- **Obacht!** Ein nüchternes Beobachten, ob die Maßnahmen funktionieren (z.B. dass sich viele Menschen nicht an die Maskenpflicht halten oder dass die Infektionszahlen trotz Lockdown weiter steigen), stellt noch keine Meinungsäußerung für oder gegen die Maßnahmen dar. Denn: Man kann die Maßnahme immer noch für gut/schlecht befinden, auch wenn man den Eindruck hat, dass sie in der Umsetzung gut/schlecht funktioniert. Nur, wenn sich der Beitrag explizit wertend gegenüber dieser Beobachtung äußert (d.h. nicht mehr nüchtern erfolgt), lässt sich daraus eine Haltung zu der Maßnahme ableiten.

Beispiel: *„Repression ist das einzige, was die Menschen verstehen. Heute klingelt an meine Tür der Kaminkehrer und lacht über Menschen, die sich nicht an soziale Distanzregel halten. #coronavirus“*

**In Summe werden also folgende Optionen annotiert:**

- **keine Maßnahmen zur Eindämmung der Pandemie genannt (NoMeasure)**

Beispiel: „*Coronavirus #COVID-19 Switzerland update Gesamtzahl der Fälle: 2,353 (132 seit dem letzten Update) Totale Todesfälle: 18 Insgesamt erholt: 4 of closed cases #CoronaVirusUpdates #COVID19 #StayHome #StayTheFHome #Switzerland*“

- **Maßnahmen werden zwar genannt, aber nicht bewertet (NoOpinion)**

Beispiel: „*Saudi-Arabien hat ausländischen Pilgern verboten, das Königreich zu betreten, um die heiligsten Stätten des Islam über das neue Coronavirus zu besuchen. #Coronavirus #CoronavirusOutbreak #COVID19 | #9News*“

- **Maßnahmen werden positiv bewertet (ProOpinion)**

Beispiel: „*@MC\_News\_Germany @mirenija @RealyRayly @warmuth2000 @LeFloid Deswegen die Schutzmaßnahmen, damit sich das Virus nicht so rasant ausbreitet sondern langsam. Sonst sterben Leute unter anderen daran nicht richtig versorgt zu werden. Und wenn alles voll mit Corona pat ist wo bleibt der Platz für die anderen Patienten?*“

- **Maßnahmen werden negativ bewertet (ConOpinion)**

Beispiel: „*Die Ausgangssperre in Kenia hat zu mehr Opfern durch Polizeigewalt geführt als durch den Virus selbst*“

**Besonderheit bei der Annotation von Twitter: Hashtags** Hashtags sind oft mehrdeutig und nur im jeweiligen Kontext zu verstehen. Deshalb gilt es folgendes bei der Annotation zu beachten: Hashtags werden nur als Kontext zum Gesagten berücksichtigt, sie stehen nie für sich.

- Hashtags werden herangezogen, um zu entscheiden, ob eine Maßnahme angesprochen wird. Dazu muss der Hashtag eine Maßnahme beinhalten:

Beispiele: *“stayathome”/“wirbleibenzuhause” = keine (Regierungs-)Maßnahme*  
*„Ausgangssperre“ = Maßnahme*

- Hashtags können als Kontext die Position in einem Tweet untermauern.

Beispiel: *“Lena Meyer-Landrut: Sängerin trägt Corona-Schutzmaske - Appell an Fans auf Instagram#lenameyerlandrut #sängerin #hannover #instagram #coronavirus #tipps #isolation #schutz #atemmaske #maskeauf #foto #appell #fans #pandemie #krise #händewaschen #abstand”*

**Allgemeiner Hinweis:** Bitte beachten Sie, dass Tweets böswillige, anzügliche, anstößige oder potenziell sensible Inhalte enthalten können. Sie können die Annotation jederzeit unterbrechen und zu einem späteren Zeitpunkt fortsetzen.
